# Supplementary material
Source: publisher site journal article supplement (https://www.e-cmh.org/upload/media/cmh-2022-0450-Supplementary-Table-1.pdf)
Supplement: Supplementary file 1 [file cmh-2022-0450-Supplementary-Table-1.pdf]

**Supplementary Table 1.** ICD-9 and 10 codes for definition of liver cirrhosis

| ICD-9 codes | ICD-10 codes         | ICD-9 Description                                                                | ICD-10 Description                                                                         |
|-------------|----------------------|----------------------------------------------------------------------------------|--------------------------------------------------------------------------------------------|
| 5712        | K7030                | Alcoholic cirrhosis of liver                                                     | Alcoholic cirrhosis of liver without ascites                                               |
| 5715        | K7460<br>K7469       | Cirrhosis of liver without mention of alcohol                                    | Unspecified cirrhosis of liver<br>Other cirrhosis of liver                                 |
| 5716        | K743<br>K744<br>K745 | Biliary cirrhosis                                                                | Primary biliary cirrhosis<br>Secondary biliary cirrhosis<br>Biliary cirrhosis, unspecified |
| 5724        | K767                 | Hepatorenal syndrome                                                             | Hepatorenal syndrome                                                                       |
| 7824        | R17                  | Jaundice, unspecified, not of newborn                                            | Unspecified jaundice                                                                       |
| 56723       | K652                 | Spontaneous bacterial peritonitis                                                | Spontaneous bacterial peritonitis                                                          |
| 5723        | K766                 | Portal hypertension                                                              | Portal hypertension                                                                        |
| 456         | NA                   | Varicose veins of other sites                                                    | NA                                                                                         |
| 4560        | 18501                | Esophageal varices with bleeding                                                 | Esophageal varices with bleeding                                                           |
| 4561        | 18500                | Esophageal varices without mention of bleeding                                   | Esophageal varices without bleeding                                                        |
| 4562        | NA                   | Esophageal varices in diseases classified elsewhere                              | NA                                                                                         |
| 45620       | 18511                | Esophageal varices in diseases classified elsewhere, with bleeding               | Secondary esophageal varices with bleeding                                                 |
| 45621       | 18510                | Esophageal varices in diseases classified elsewhere, without mention of bleeding | Secondary esophageal varices without bleeding                                              |
| NA          | K717                 | NA                                                                               | Toxic liver disease with fibrosis and cirrhosis of liver                                   |
| NA          | K721                 | NA                                                                               | Chronic hepatic failure                                                                    |
| NA          | K729                 | NA                                                                               | Hepatic failure, unspecified                                                               |
| NA          | 1982                 | NA                                                                               | Oesophageal varices without bleeding in diseases classified elsewhere                      |
| NA          | 1983                 | NA                                                                               | Oesophageal varices with bleeding in diseases classified elsewhere                         |

ICD, International Classification of Diseases; NA, not applicable.
